# Supplementary material
Source: Springer Nature journal article supplement (https://www.springermedizin.de/resource/supplementary/12913_2011_1852_MOESM2_ESM.pdf/9529136)

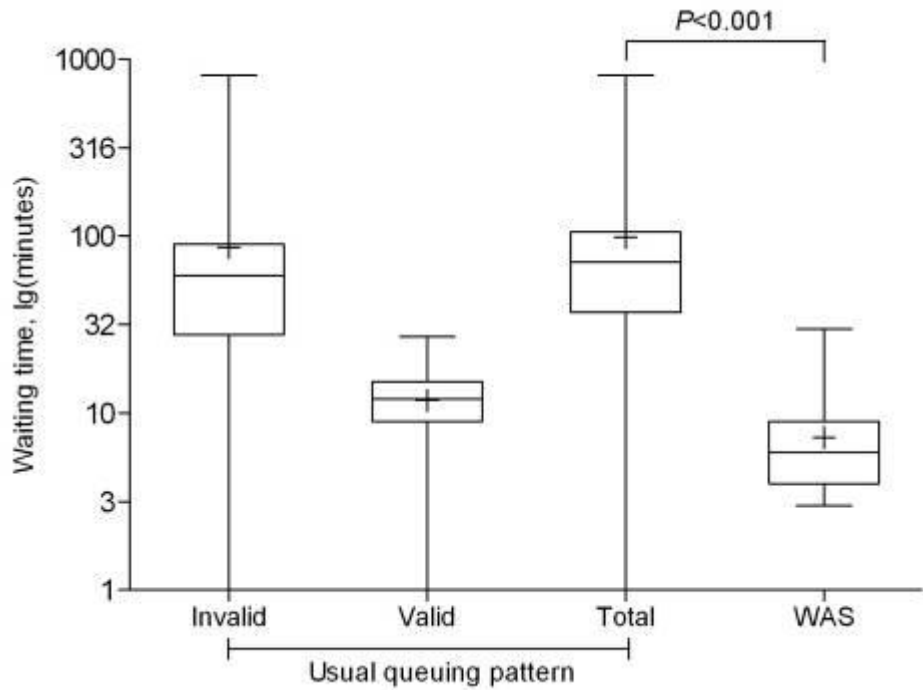

Supplement: MOESM2 [file 9529136]
